# Supplementary material for: Host genetic variation in SPINK5 regulates rumen epithelial barrier function and shapes heritable microbial communities through SCFA-mediated mechanisms in dairy cattle
Source: Research Square preprint supplement (doi:10.21203/rs.3.rs-8264600/v1), 2026-01-19
Supplement: Supplementary file 2 [file 2802719fbe9f313dd6ac1f12.xlsx]

## Sheet: Table S2
Raw rumen fermentation data for Holstein dairy cows, including concentrations of individual short‑chain fatty acids (acetic acid, propionic acid, butyric acid, isobutyric acid, isovaleric acid, and valeric acid), total SCFAs, the acetic acid‑to‑propionic acid ratio, and rumen pH for each sample.
Sample ID	Acetic acid	Propionic acid	Butyric acid	Isobutyric acid​​	Isovaleric acid	Valeric acid	Total SCFAs	Acetic acid/Propionic acid	pH
1	75.17	33.12	16.64	1.25	1.97	1.62	129.77	2.27	7.06
2	58.37	13.66	10.8	1.02	1.33	0.86	86.04	4.27	6.53
3	97.02	15.13	19.34	0.8	1.68	2.39	136.36	6.41	6.41
4	81	12.09	11.15	0.62	1.14	1.99	107.99	6.7	6.45
5	80.27	14.97	12.17	0.97	1.53	2.22	112.13	5.36	6.42
6	97.83	20.14	12.39	1.25	2.16	2.73	136.5	4.86	6.82
7	78.92	18.58	11.31	0.62	1.26	2.31	113	4.25	6.46
8	82.22	27.26	17.17	1.31	2.65	3.65	134.26	3.02	6.32
9	74.24	19.22	10.93	0.78	1.26	1.94	108.37	3.86	5.93
10	79.79	15.58	11.06	0.8	1.43	2.12	110.78	5.12	6.42
11	89.14	26.19	12.29	0.8	1.4	2.71	132.53	3.4	6.11
12	95.67	39.3	19.63	0.97	1.73	2.22	159.52	2.43	6.18
13	64.03	29.69	11.4	0.49	0.91	1.25	107.77	2.16	6.26
14	72.97	13.6	12	1.03	1.59	2.22	103.41	5.36	6.17
15	94.72	26.65	14.58	0.43	1.81	2.71	140.9	3.55	6.51
16	94.95	18.92	12.34	0.71	1.35	2.28	130.55	5.02	6.31
17	69.32	17.98	7.11	0.23	1.22	1.79	97.65	3.85	6.2
18	81.62	22.92	11.73	1.11	2.22	2.61	122.21	3.56	6.86
19	103.35	19.63	8.93	0.65	1.26	2.36	136.18	5.26	6.39
20	71.13	12.79	8.87	0.81	1.5	1.82	96.92	5.56	6.78
21	75.22	29.89	14.61	0.84	1.5	1.21	123.27	2.52	6.44
22	81.56	14.66	10.59	0.28	1.19	1.75	110.03	5.56	5.85
23	61.77	13.43	8.69	0.67	0.94	1.55	87.05	4.6	6.54
24	84.39	15.3	10.25	0.88	1.53	2.06	114.41	5.51	6.47
25	68.99	24.78	13.13	0.38	1.5	1.32	110.1	2.78	6.18
26	75.64	33.65	13.47	0.28	1.09	1.37	125.5	2.25	6.62
27	65.18	26.84	12.51	0.58	1.49	1.52	108.12	2.43	7.11
28	66.63	24.61	10.29	0.32	0.95	1.09	103.89	2.71	7.22
29	93.65	43.1	18.53	0.28	1.7	1.96	159.22	2.17	7.01
30	87.82	44.14	17.59	1.44	2.42	2.34	155.75	1.99	6.46
31	85.79	34.36	15.09	0.88	1.4	1.14	138.66	2.5	6.66
32	73.56	31.37	12.41	0.29	1.34	1.29	120.26	2.35	6.26
33	79.41	35.4	14.11	1.23	1.3	1.32	132.77	2.24	6.62
34	82.29	33.61	13.06	0.92	0.66	0.9	131.44	2.45	6.08
35	79.99	20.1	8.47	1.29	0.87	0.6	111.32	3.98	6.65
36	61.8	23.88	14.98	0.89	1.45	1.41	104.41	2.59	7.07
37	76.52	39.3	13.91	1.59	1.1	1.16	133.58	1.95	7.3
38	70.29	27.12	11.87	0.25	1.15	1.53	112.21	2.59	6.54
39	87.06	26.21	14.06	1.54	1.63	1.01	131.51	3.32	6.4
40	72.56	25.86	13.91	0.59	1.24	1.14	115.3	2.81	6.11
41	59.51	27.92	8.97	0.24	1.15	1.08	98.87	2.13	6.41
42	80.16	38.48	14.06	0.91	1.36	1.32	136.29	2.08	6.18
43	81.6	34.44	15.72	0.73	1.1	1.36	134.95	2.37	6.51
44	92.15	30.89	10.84	1	1.26	0.43	136.57	2.98	6.87
45	73.31	29.83	10.63	0.32	1.04	0.98	116.11	2.46	6.31
46	82.11	33.57	9.87	1.52	0.93	1.23	129.23	2.45	6.83
47	71.27	30.97	10.31	0.82	1.3	1.09	115.76	2.3	6.41
48	71.27	36.16	15.13	0.42	1.44	1.72	126.14	1.97	7.15
49	61.64	35.03	12.15	0.44	1.22	1.49	111.97	1.76	7.02
50	84.22	37.02	14.59	1.3	1.98	1.82	140.93	2.27	6.63
51	82.48	34.59	14.56	0.54	1.02	1.39	134.58	2.38	6.1
52	78.85	31.73	12.62	0.5	0.93	1.25	125.88	2.49	6.68
53	62.01	25.78	9.36	1.84	0.52	0.36	99.87	2.41	6.61
54	70.1	26.45	11.88	1.3	0.96	0.99	111.68	2.65	6.5
55	60.95	21.69	10.36	0.72	1.24	1.6	96.56	2.81	5.94
56	78.97	36.98	13.26	0.84	1.19	1.15	132.39	2.14	6.39
57	68.08	27.51	13.49	0.64	1.01	1.08	111.81	2.47	6.85
58	97.54	39.43	20.83	0.76	1.59	1.73	161.88	2.47	6.5
59	47.58	15.75	7.41	0.76	1.04	0.61	73.15	3.02	6.02
60	68.77	30.57	13.91	0.59	1.22	1.31	116.37	2.25	6.41
61	58.6	23.66	10.22	0.42	1.67	0.3	94.87	2.48	6.37
62	69.01	26.4	10.51	0.45	1.2	1.66	109.23	2.61	6.43
63	87.02	33.21	15.02	0.96	1.36	1.37	138.94	2.62	6.48
64	87.56	27.74	15.81	0.72	0.99	1.07	133.89	3.16	6.9
65	111.08	33.28	25.95	0.85	1.78	1.49	174.43	3.34	6.76
66	99.47	23.74	11.08	1.1	1.47	2.6	139.46	4.19	6.69
67	83.06	20.58	10.82	1.09	1.59	2.41	119.55	4.04	7.03
68	67.43	11.1	8.77	0.77	1.22	1.55	90.84	6.08	6.22
69	80.73	16.95	11.49	1.1	2	1.87	114.14	4.76	6.31
70	73.42	19.73	9.03	0.81	1.42	1.87	106.28	3.72	6.59
71	88.01	20.77	13.68	0.31	1.4	2.75	126.92	4.24	6.42
72	86.24	15.72	11.83	0.83	1.34	2.16	118.12	5.49	6.19
73	98.43	27.48	12.19	0.97	1.97	3.03	144.07	3.58	6.81
74	62.8	4.12	6.34	0.59	0.89	0.68	75.42	15.25	6.26
75	89.62	25.47	15.24	0.84	1.24	3.08	135.49	3.52	6.54
76	70.79	14.89	10.42	0.9	1.48	2.22	100.7	4.75	6.74
77	97.26	34.65	12.99	0.44	1.53	3.09	149.96	2.81	6.44
78	80.64	13.73	11.26	1.1	1.88	2.54	111.15	5.87	6.54
79	82.37	12.91	10.69	0.77	1.93	2.29	110.96	6.38	6.69
80	83.49	17.79	9.66	0.87	1.63	2.45	115.89	4.69	5.85
81	86.53	25.31	13.11	0.54	1.53	2.66	129.68	3.42	6.33
82	96.38	29.66	13.45	0.99	1.98	4.43	146.89	3.25	6.66
83	92.11	34.34	11.62	0.85	1.47	2.64	143.03	2.68	6.33
84	93.37	18.51	12.4	1.23	1.84	2.57	129.92	5.04	6.77
85	82.96	20.16	8.35	0.6	1.05	1.81	114.93	4.12	6.41
86	94.46	24.9	13.63	0.96	1.32	2.75	138.02	3.79	6.34
87	110.31	12.48	12.52	0.94	1.63	2	139.88	8.84	6.58
88	74.27	27.54	14.01	0.53	1.08	1.12	118.55	2.7	6.95
89	68.67	20.69	11.77	0.79	1.59	2.61	106.12	3.32	6.31
90	61.11	11.94	10.19	0.77	1.16	1.68	86.85	5.12	6.39
91	97.44	20.75	13.57	1.12	1.81	2.33	137.02	4.7	6.57
92	79.41	38.23	15.23	0.67	1.45	2	136.99	2.08	6.93
93	102.53	23.92	16.28	0.83	1.9	1.66	147.12	4.29	6.72
94	83.49	23.89	9.95	0.53	1.55	3.05	122.46	3.5	6.17
95	75.39	13.5	11.49	1.04	1.81	2.28	105.51	5.58	6.47
96	82.45	20.12	15.65	0.98	1.85	2.9	123.95	4.1	7.14
97	93.55	19.44	13.32	1.06	2.01	2.88	132.26	4.81	6.28
98	82.34	15.94	12.11	0.85	1.25	0.85	113.34	5.17	6.78
99	82.77	15.63	15.51	0.8	0.82	0.75	116.28	5.29	6.64
100	63.04	16.32	10.26	0.56	1.25	0.67	92.1	3.86	6.64
101	95.72	25.36	17.2	0.7	1.68	1.2	141.86	3.77	6.3
102	77.85	26.03	12.79	0.73	1.03	0.99	119.42	2.99	6.32
103	79.8	21.24	11.46	0.85	1.14	0.81	115.3	3.76	6.52
104	72.16	20.22	12.38	0.85	1.14	0.81	107.56	3.57	6.77
105	77.47	18.43	12.55	0.79	1.29	0.79	111.32	4.2	6.56
106	61.12	26.6	14.23	0.56	1.63	1.27	105.41	2.3	6.59
107	76.31	19.63	16.26	0.75	1.45	0.92	115.32	3.89	6.66
108	77.08	45.03	12.18	0.58	1.29	1.67	137.83	1.71	6.27
109	66.28	17.46	12.62	0.71	1.04	0.82	98.93	3.8	6.35
110	83.63	22	17.03	0.71	1.31	1.11	125.79	3.8	6.31
111	72.6	25.22	18.25	0.55	1.04	1.47	119.13	2.88	6.44
112	74.57	18.91	11.47	0.95	1.55	0.99	108.44	3.94	6.68
113	85.39	26.51	12.93	0.47	1.1	1.24	127.64	3.22	6.24
114	68.43	21.03	12.67	0.77	1.37	1.11	105.38	3.25	6.91
115	69.83	27.5	13.11	0.74	1.74	1.4	114.32	2.54	6.69
116	72.83	27.46	12.88	0.53	0.89	0.96	115.55	2.65	6.65
117	76.96	20.62	15.34	0.76	1.53	1.25	116.46	3.73	6.38
118	74.51	26.99	13.65	0.84	1.48	1.19	118.66	2.76	6.84
119	104.68	29.4	16.45	0.96	1.66	1.21	154.36	3.56	6.58
120	79.33	21.85	11.47	0.87	1.68	1.06	116.26	3.63	6.91
121	53.91	15.76	10.69	0.65	1.23	0.93	83.17	3.42	7.11
122	66.74	27.83	11.72	0.62	1.09	1.2	109.2	2.4	6.61
123	76.9	20.56	11.13	0.4	1.03	0.84	110.86	3.74	6.74
124	101.3	34.34	9.94	0.67	1.32	1.38	148.95	2.95	6.87
125	82.66	25.15	16.13	0.72	1.44	1.19	127.29	3.29	6.42
126	98.4	28.79	14.87	0.62	1.46	1.34	145.48	3.42	6.2
127	89.85	30.41	16.83	0.52	1.64	1.88	141.13	2.95	6.57
128	78.49	22.95	11.26	1.09	1.74	1.23	116.76	3.42	6.68
129	84.91	23.6	12.79	0.62	1.25	0.95	124.12	3.6	6.62
130	87.05	20.9	10.74	0.87	1.91	1.15	122.62	4.16	6.7
131	90.48	23.94	13.48	0.68	0.94	1.26	130.78	3.78	6.08
132	60.71	17.76	12.16	0.4	1.19	0.83	93.05	3.42	6.63
133	64.2	17.29	13.1	0.65	1.35	1.12	97.71	3.71	6.48
134	83.34	31.81	14.67	0.66	1.12	1.44	133.04	2.62	6.47
135	87.41	17.34	8.24	0.83	1.21	1.16	116.19	5.04	6.36
136	71.62	27.38	13.12	0.46	1.07	1.41	115.06	2.62	6.69
137	64.8	15.09	9.89	0.44	0.8	0.75	91.77	4.29	6.62
138	84.96	19.35	18.03	0.74	1.86	1.1	126.04	4.39	6.5
139	92.73	27.07	14.44	0.62	1.35	0.97	137.18	3.43	6.42
140	95.51	17.96	17.11	0.67	1.56	0.9	133.71	5.32	6.77
141	28.29	13.81	3.45	0.22	0.41	0.39	46.57	2.05	7.09
142	80.8	40.29	12.49	0.46	1.17	1.43	136.64	2.01	6.13
143	64.44	25.11	14.39	0.66	1.05	1.3	106.95	2.57	7.09
144	88.48	34.67	14.7	0.6	1.55	1.75	141.75	2.55	6.65
145	73.23	22.64	16.46	0.54	1.27	1.23	115.37	3.23	6.28
146	67.83	20.49	15.48	0.56	1.22	1.21	106.79	3.31	6.76
147	86.74	35.93	11.69	0.61	1.2	1.06	137.23	2.41	6.41
148	77.3	27.2	17.77	0.55	1.2	1.12	125.14	2.84	6.71
149	99.13	18.68	15.3	0.5	1.04	0.92	135.57	5.31	6.22
150	77.7	22.2	15.18	0.85	1.6	1.53	119.06	3.5	6.68
151	69.56	20.31	10.71	0.72	0.95	0.88	103.13	3.43	6.44
152	82.22	20.03	17.76	0.73	1.3	0.95	122.99	4.1	6.53
153	125.96	31.91	17.2	1.03	2.14	1.68	179.92	3.95	6.71
154	81.52	37.5	13.39	0.64	1.39	1.39	135.83	2.17	6.92
155	137.88	36.85	17.46	1.48	2.15	1.73	197.55	3.74	6.42
156	61.38	26.48	9.64	0.71	1.03	1.06	100.3	2.32	7.15
157	60.07	13.35	10.53	0.5	1.2	0.96	86.61	4.5	6.77
158	110.74	51.01	21.97	0.74	1.81	2.03	188.3	2.17	6.58
159	77.18	31	13.15	0.71	0.95	1.07	124.06	2.49	6.9
160	86.32	27.22	14.26	0.62	1.21	1.27	130.9	3.17	6.47
161	68.65	22.55	12.3	0.77	1.11	1.04	106.42	3.04	6.78
162	62.43	18.92	8.35	0.85	1.25	1	92.8	3.3	7.17
163	66.15	18.17	10.76	0.6	0.87	1.07	97.62	3.64	7.22
164	78.07	28.27	13.51	0.55	0.86	1.02	122.28	2.76	6.43
165	68.95	19.61	15.68	0.92	1.03	0.91	107.1	3.52	6.72
166	71.72	16.77	9.74	0.58	0.87	0.75	100.43	4.28	6.47
167	69.45	34.21	10.93	0.91	1.33	1.29	118.12	2.03	6.96
168	71.76	25.91	13.59	0.78	0.91	1.07	114.02	2.77	7.01
169	86.95	25.92	17.52	1.09	1.66	1.4	134.54	3.35	6.48
170	98.8	34.29	18.15	0.96	1.42	2.28	155.9	2.88	7.27
171	51.01	23.22	10.75	0.52	0.94	1.12	87.56	2.2	6.8
172	69.67	33.58	14.95	0.99	1.82	2.18	123.19	2.07	6.74
173	52.08	15.12	8.37	0.63	0.93	0.58	77.71	3.45	6.92
174	64.99	28	11.03	0.68	1.67	1.13	107.5	2.32	6.98
175	64.34	15.21	8.12	0.53	0.84	0.54	89.58	4.23	6.56
176	82.75	15.36	14.52	1.19	1.78	0.9	116.5	5.39	6.7
177	32.02	10.92	4.92	0.49	0.65	0.53	49.53	2.93	6.51
178	58.5	22.08	12.29	0.93	1.16	1.14	96.1	2.65	6.97
179	72.63	18.55	15.61	0.77	1.36	1.31	110.23	3.91	7.01
180	68.27	23.19	14.93	0.93	1.28	1.4	110	2.94	6.69
181	59.56	21.43	12.89	0.78	1.15	1.25	97.06	2.78	7.44
182	78.92	35.75	15.42	0.72	1.25	1.48	133.54	2.21	6.54
183	86.87	26.63	13.19	1.16	1.66	1.41	130.92	3.26	6.77
184	70.33	25.15	12.42	0.85	1.62	1.58	111.95	2.8	6.75
185	36.71	5.34	6.09	0.43	0.91	0.58	50.06	6.88	7.76
186	58.58	17.55	11.05	0.64	0.86	0.81	89.49	3.34	7.39
187	66.79	23.95	9.25	0.34	0.6	0.34	101.27	2.79	7.09
188	84.84	24	13.37	0.55	0.8	1.19	124.75	3.54	6.66
189	79.4	24.7	20.32	0.1	1.57	1.23	127.32	3.21	6.83
190	48.34	24.97	8.38	0.63	1.02	0.9	84.24	1.94	6.72
191	87.17	25.62	15.03	0.79	1.59	1.93	132.13	3.4	6.5
192	64.91	29.69	12	0.78	1.24	1.4	110.02	2.19	6.38
193	66.03	17.79	9.61	0.45	0.76	0.85	95.49	3.71	6.67
194	62.81	27.3	14.19	0.82	1.51	1.57	108.2	2.3	6.47
195	83.42	28.52	15.98	0.85	1.81	1.28	131.86	2.93	6.42
196	97.17	40.11	18.64	0.5	1.4	2.11	159.93	2.42	6.52
197	49.23	7.18	6.73	0.57	0.66	0.41	64.78	6.86	6.95
198	100.43	22.09	13.98	0.66	1.19	1.18	139.53	4.55	6.25
199	77.52	21.96	17.23	1.05	1.18	1.05	119.99	3.53	6.94
200	56.07	11.22	10.97	0.77	1.17	0.79	80.99	5	7.69
201	77.81	21.45	9.67	0.67	1.11	0.83	111.54	3.63	6.84
202	55.97	12.91	8.9	0.6	0.8	0.48	79.66	4.34	7.4
203	58.44	23.02	11.64	0.9	0.97	0.91	95.88	2.54	6.92
204	55.32	10.59	10.44	0.51	0.89	0.58	78.33	5.22	7.06
205	102.08	37.27	20.64	0.89	1.72	2.4	165	2.74	6.77
206	82.42	24.12	17.12	0.95	1.23	1.39	127.23	3.42	6.84
207	90.6	23.9	16.79	0.79	0.88	0.94	133.9	3.79	6.43
208	61.69	21.34	11.48	0.59	0.93	1.14	97.17	2.89	6.58
209	72.5	34.01	16.84	0.99	1.58	1.62	127.54	2.13	6.49
210	69.89	24.48	11.81	0.63	0.98	1.3	109.09	2.85	7.14
211	71.28	21.58	8.04	0.63	0.99	0.82	103.34	3.3	6.89
212	78.2	21.39	15.12	0.89	1.49	1.25	118.34	3.66	7.27
213	88.62	28.47	20.73	1.2	1.84	1.45	142.31	3.11	6.64
214	84.35	24.6	19.25	0.97	1.95	1.51	132.63	3.43	6.86
215	75.58	24.71	15.2	0.92	1.13	1.4	118.94	3.06	6.87
216	40.02	22.58	8.2	0.65	1.43	2.15	75.03	1.77	7.32
217	79.18	16.97	10.96	0.84	1.14	0.98	110.07	4.67	7.01
218	54.99	17.27	10.88	0.54	0.97	1.04	85.69	3.18	6.75
219	76.56	33.33	13.98	0.74	1.09	1.86	127.56	2.3	6.45
220	56.68	12.72	12.27	0.98	1.37	0.95	84.97	4.46	7.32
221	85.48	43.96	12.13	0.05	0.46	1.56	143.64	1.94	6.92
222	51.87	18.29	11.1	0.57	0.66	1.01	83.5	2.84	6.76
223	86.8	33.71	14.84	1.03	1.43	1.39	139.2	2.57	6.33
224	66.79	15.05	12.92	0.94	1.2	1.03	97.93	4.44	6.92
225	83.65	27.39	15.18	1.09	1.76	1.6	130.67	3.05	6.92
226	65.33	11.85	10.45	0.31	0.63	0.63	89.2	5.51	6.75
227	81.4	21.22	15.21	0.91	1.4	1.33	121.47	3.84	6.48
228	84.56	18.88	21.26	1.05	1.49	1.31	128.55	4.48	6.61
229	39.65	11.42	6.8	0.82	0.92	0.53	60.14	3.47	7.51
230	100.07	30.14	16.43	0.67	1.41	1.4	150.12	3.32	6.66
231	57.08	14.55	10.47	0.71	0.77	0.86	84.44	3.92	7.18
232	57.53	26.59	9.53	0.6	1.39	1.27	96.91	2.16	6.47
233	72.6	22.26	11.15	1.12	0.95	0.93	109.01	3.26	6.92
234	62.48	24.91	11.85	0.69	0.91	1.14	101.98	2.51	7.37
235	51.27	23.99	8.85	0.67	1.09	1.12	86.99	2.14	7.42
236	57.87	25.82	10.83	0.72	1.3	0.98	97.52	2.24	6.6
237	70.77	11.88	9.52	0.61	1.12	0.78	94.68	5.96	6.43
238	61.68	15.43	14.62	0.77	1.3	0.89	94.69	4	6.9
239	70.62	23.2	13.21	0.58	0.96	1.14	109.71	3.04	6.06
240	64.45	27.43	11.18	0.8	0.9	1.43	106.19	2.35	6.72
241	69.16	24.12	11.39	0.66	0.84	1.01	107.18	2.87	6.74
242	59.54	27.56	10.17	1.01	1.55	1.54	101.37	2.16	6.99
243	71.32	38.82	11.44	0.88	1.42	1.17	125.05	1.84	6.67
244	57.08	20.42	9.83	0.52	0.82	7.3	95.97	2.8	6.62
245	74.95	38.13	13.92	8.85	1.51	1.34	138.7	1.97	6.77
246	50.69	19.04	8.55	0.54	1.03	0.95	80.8	2.66	7.18
247	60.46	22.94	12.9	0.74	1.07	1.18	99.29	2.63	7.14
248	77.86	35.17	15.05	0.97	1.44	1.77	132.26	2.21	6.98
249	77.54	29.77	17.23	1.05	1.32	1.38	128.29	2.6	6.62
250	13.24	1.54	4.18	0.27	0.47	0.38	20.08	8.58	7.94
251	50.44	16.45	9.42	0.69	0.94	0.87	78.81	3.07	6.89
252	65.75	11.42	11.83	0.59	0.96	0.67	91.22	5.76	7.25
253	74.21	34.26	13.84	1.05	1.61	1.44	126.41	2.17	6.38
254	87.28	34.15	11.88	0.74	1.23	1.34	136.62	2.56	6.15
255	81.48	21.34	17.18	1.05	1.92	1.23	124.2	3.82	6.74
256	59.81	22.36	8.74	0.72	1.11	0.98	93.72	2.67	6.57
257	79.96	10.67	11.46	0.61	0.94	0.58	104.22	7.49	6.5
258	86.23	23.16	20.27	1.18	1.63	1.43	133.9	3.72	6.68
259	82.91	25.32	16.31	0.91	1.18	1.17	127.8	3.27	6.32
260	72.67	29.26	12.03	0.94	1.41	1.74	118.05	2.48	6.6
261	88.38	35.18	17.36	0.68	1.15	1.42	144.17	2.51	6.19
262	82.54	32.79	13.9	0.53	1.92	1.94	133.62	2.52	5.99
263	96.68	44.51	17.75	0.78	1.5	1.92	163.14	2.17	5.98
264	81.16	48.11	12.35	0.18	0.45	2.51	144.76	1.69	6.53
265	79.22	40.08	15.5	0.42	0.83	1.55	137.6	1.98	6.1
266	30.04	9.4	6.18	0.08	0.42	0.61	46.73	3.2	6.59
267	63.97	30.93	16.14	0.41	0.64	1.57	113.66	2.07	6.16
268	75.69	38.4	14.71	0.31	1.03	1.56	131.7	1.97	6.37
269	89.57	38.78	22.9	0.14	1.22	2.25	154.86	2.31	6.18
270	78.98	40.63	14.29	0.42	0.86	2.21	137.39	1.94	6.66
271	85.68	25.55	18.41	0.96	1.29	1.85	133.74	3.35	6.89
272	71.5	29.91	17.99	0.87	1.57	1.58	123.42	2.39	6.56
273	102.36	48.54	24.03	0.33	1.66	2.27	179.19	2.11	5.95
274	99.45	52.6	18.95	0.19	0.97	1.78	173.94	1.89	5.78
275	73.5	42.63	12.26	0.6	1.29	1.9	132.18	1.72	6.28
276	97.3	38.02	19.97	0.76	1.51	1.76	159.32	2.56	6.36
277	82.75	33.71	14.07	0.61	1.14	1.49	133.77	2.45	6.42
278	107.69	57.7	20.35	0.73	1.98	2.88	191.33	1.87	5.49
279	74.28	24.16	13.71	0.5	0.95	1.15	114.75	3.08	6.63
280	65.95	23.94	13.97	0.62	0.72	1.65	106.85	2.75	6.04
281	89.19	27.41	13.83	0.36	0.96	1.07	132.82	3.25	6.58
282	102.16	54.37	21.18	0.45	1.16	1.99	181.31	1.88	5.59
283	71.52	22.38	15.95	0.64	0.94	1.2	112.63	3.2	6.28
284	103.37	35.53	23.02	0.81	1.62	2.06	166.41	2.91	6.12
285	95.78	42.7	21.04	0	1.08	1.68	162.28	2.24	5.79
286	99.28	51.13	17.16	0.45	1.15	1.88	171.05	1.94	5.69
287	68.45	19.83	16.17	1.01	1.4	1.45	108.31	3.45	6.49
288	98.86	38.69	21.4	0.6	0.94	2.05	162.54	2.55	5.49
289	92.93	58.99	19.51	0.25	1.14	2.01	174.83	1.58	5.54
290	51.78	24.38	12.65	0.07	0.59	1.14	90.61	2.12	5.99
291	108.75	55.91	20.29	0.38	0.93	2.07	188.33	1.94	5.91
292	81.12	31.58	14.91	0.06	0.8	1.44	129.91	2.57	6.09
293	80.26	45.83	17.98	0.49	1.06	1.77	147.39	1.75	5.63
294	67.29	20.53	14.25	0.19	0.53	1.1	103.89	3.28	6.77
295	80.76	44.76	13.82	0.26	0.69	1.77	142.06	1.8	6.48
296	82.76	37.23	15.76	0.41	0.91	1.59	138.66	2.22	6.02
297	79.58	38.21	15.24	0.28	1.16	1.83	136.3	2.08	6.55
298	78.92	30.55	20.3	0.81	1.13	1.57	133.28	2.58	6.33
299	101.82	54.02	20.11	0	0.96	2.54	179.45	1.89	5.7
300	82.25	43.23	17.45	0.34	1	2.65	146.92	1.9	7.35
301	101.43	52.5	19.85	0.48	1.52	2.48	178.26	1.93	5.6
302	84.48	42.73	17.8	0.32	0.95	1.85	148.13	1.98	5.65
303	78.35	32.83	14.6	0.25	0.9	1.25	128.18	2.39	6.16
304	82.54	32	14.08	0.55	0.91	1.46	131.54	2.58	6.79
305	86.56	34.74	16.02	0.47	1.01	1.52	140.32	2.49	6.41
306	78.29	23.05	19.1	0.79	1.52	1.61	124.36	3.4	6.6
307	96.58	42.28	15.04	0.26	0.96	1.61	156.73	2.28	6.67
308	75.15	39.15	13.27	0.66	1.69	1.82	131.74	1.92	6.28
309	63.95	31.05	9.97	0.34	1	1.55	107.86	2.06	6.28
310	72.99	23.61	14.76	0.61	1.05	1.7	114.72	3.09	6.71
311	57.26	29.78	9.03	0.35	0.88	2.14	99.44	1.92	6.77
312	90.98	32.93	17.64	0.27	0.68	1.66	144.16	2.76	6.08
313	86.66	46.35	16.99	0.45	1.02	1.54	153.01	1.87	5.95
314	92.53	22.58	15.53	0.58	1.36	1.77	134.35	4.1	6.54
315	69.72	28.47	11.89	0.22	0.66	1.39	112.35	2.45	6.79
316	76.86	27.14	16.73	0.19	1.08	1.45	123.45	2.83	6.41
317	84.39	39.7	17.55	0.63	1.53	2.03	145.83	2.13	6.19
318	85.21	32.96	15.89	0.39	0.91	1.35	136.71	2.59	6.46
319	69.68	27.54	14.47	0.24	1.3	1.59	114.82	2.53	6.61
320	72.64	34.35	13.55	0.44	0.68	1.49	123.15	2.11	6.28
321	88.66	45	20.1	0.86	1.7	2.59	158.91	1.97	6.44
322	75.92	44.31	15.13	0.37	1.01	1.85	138.59	1.71	6
323	74.67	37.55	13.6	0.57	1.04	1.63	129.06	1.99	6.08
324	50.93	24.21	8.72	0.26	0.81	1.19	86.12	2.1	5.78
325	78.6	32.92	14.3	0.46	1.05	1.19	128.52	2.39	6.36
326	72.67	35.23	15.1	0.35	1.32	1.75	126.42	2.06	6.49
327	82.88	46.8	13.89	0.63	1.4	1.69	147.29	1.77	6.19
328	48.1	22.78	9.97	0.24	0.66	1.11	82.86	2.11	5.85
329	65.74	30.59	12.05	0.43	0.68	1.6	111.09	2.15	6.35
330	78.38	41.05	14.34	0.3	0.48	1.61	136.16	1.91	6.85
331	70.05	31.54	13.14	0.28	0.76	1.29	117.06	2.22	6.49
332	82.93	45.91	13.55	0.09	0.54	1.64	144.66	1.81	6.35
333	83.29	31.67	17.96	0.3	0.62	1.48	135.32	2.63	5.72
334	73.46	26.02	13.1	0.15	1.42	1.09	115.24	2.82	6.62
335	84.21	36.3	12.26	0.76	1.59	1.51	136.63	2.32	5.98
336	99.73	36.36	16.11	0.6	1.71	1.63	156.14	2.74	6.36
337	81.6	36.93	15.2	0.44	1.05	1.49	136.71	2.21	6.57
338	64.34	30.16	15.14	0.47	1.15	1.5	112.76	2.13	6.71
339	58.89	36.13	10.07	0.24	0.85	2.47	108.65	1.63	5.59
340	81.03	45.46	18.18	0.37	0.85	1.73	147.62	1.78	6.03
341	67.46	33.5	14.84	0.2	0.39	1.17	117.56	2.01	6.4
342	78.17	48.87	15.45	0	1.06	1.85	145.4	1.6	5.92
343	81.79	37.18	13.45	0.18	0.67	1.24	134.51	2.2	6.01
344	72.36	36.41	12.16	0.36	0.69	1.5	123.48	1.99	6.05
345	81.63	38.68	17.11	0.3	1.25	1.75	140.72	2.11	6.12
346	61.85	17.86	12.94	0.4	0.75	0.87	94.67	3.46	6.7
347	90.05	43.48	22.36	0.36	2.31	2.03	160.59	2.07	6.16
348	90.82	43.18	17.46	0.58	1.19	1.75	154.98	2.1	5.67
349	87.08	30.08	20.54	0.84	1.54	1.86	141.94	2.89	5.98
350	72.19	25.65	17.09	0.55	0.85	1.51	117.84	2.81	6.69
351	75.24	24	16.13	0.6	0.95	1.44	118.36	3.14	6.35
352	93.47	49.47	20.07	0	1.42	2.55	166.98	1.89	5.87
353	101.8	41.9	19.09	0.53	1.34	1.63	166.29	2.43	6.25
354	78.1	29.34	12.27	0.34	0.81	1.23	122.09	2.66	6.53
355	93.19	44.99	18	0.53	1.16	1.72	159.59	2.07	6.95
356	79.54	41.43	14.9	0.38	0.88	1.75	138.88	1.92	5.76
357	79.08	52.31	18.35	0	0.67	1.92	152.33	1.51	6.01
358	78.38	49.97	18.73	0	0.65	1.95	149.68	1.57	5.5
359	74.95	33.57	17.09	0.65	1.01	1.65	128.92	2.23	6.42
360	81.17	33.82	14.56	0.85	1.51	1.77	133.68	2.4	6.55
361	76.12	29.39	10.27	0.15	0.76	1.09	117.78	2.59	5.93
362	69.92	31.27	11.99	0.2	0.74	1.06	115.18	2.24	6.69
363	89.05	41.18	17.33	0	0.88	1.68	150.12	2.16	5.9
364	64.86	31.32	13.95	0.57	0.95	1.54	113.19	2.07	5.99
365	60.96	28.74	16.81	0.6	0.81	1.27	109.19	2.12	5.75
366	73.72	29.48	13.3	0.49	0.88	1.32	119.19	2.5	6.59
367	61.41	31.95	12.83	0.31	0.72	1.44	108.66	1.92	6.34
368	89.28	58.67	21.43	0.54	1.13	2.3	173.35	1.52	5.68
369	79.04	46.14	12.74	0.42	0.93	2.13	141.4	1.71	6.32
370	71.7	39.37	17.22	0.51	0.71	1.96	131.47	1.82	5.76
371	83.21	35.89	17.88	0.53	1.13	1.56	140.2	2.32	6.11
372	54.32	26.68	11.01	0.41	0.68	0.95	94.05	2.04	6.31
373	75.89	29.36	12.83	0.22	0.67	1.3	120.27	2.58	6.56
374	85.96	34.7	13.88	0.21	0.73	1.4	136.88	2.48	5.93
375	67.51	40.4	12.63	0	1.05	2.38	123.97	1.67	6.04
376	59.67	32.81	11.06	0.31	0.71	1.19	105.75	1.82	6.45
377	77.86	26.9	16.05	0.49	0.91	1.29	123.5	2.89	6.47
378	65.54	31.31	11.46	0.25	0.8	1.52	110.88	2.09	6.64
379	47.57	19.87	8.4	0.44	0.75	0.94	77.97	2.39	6.67
380	73.02	29.86	12.11	0.21	0.69	1.4	117.29	2.45	6.43
381	72.86	39.83	12.99	0	0.64	1.6	127.92	1.83	5.85
382	71.63	29.31	11.93	0.38	0.67	1.01	114.93	2.44	6.24
383	66.11	34.17	12.45	0.26	0.64	1.5	115.13	1.93	6.37
384	80.47	35.46	13.78	0.39	0.8	1.65	132.55	2.27	6.33
385	75.2	41.02	18.52	0	1.09	2.4	138.23	1.83	6.14
386	69.44	30.11	13.98	0.06	0.67	1.32	115.58	2.31	6.61
387	65.71	34.06	12.11	0.39	0.84	1.49	114.6	1.93	6.94
388	70.42	25.84	14.04	0.06	0.72	1.27	112.35	2.73	6.62
389	84.31	51.96	16.47	0	0.85	1.89	155.48	1.62	5.64
390	72.09	30.8	11.71	0.4	0.76	1.42	117.18	2.34	6.26
391	80.97	41.85	18.51	0.13	1.12	1.78	144.36	1.93	5.83
392	96.35	55.57	18.55	0.19	1.07	2.13	173.86	1.73	5.93
393	36.67	7.15	5.5	0.71	1.05	1.06	52.14	5.13	7.18
394	87.03	34.78	18.22	0.34	1.47	1.42	143.26	2.5	6.12
395	108.61	57.04	21.36	0.31	1.04	1.84	190.2	1.9	5.62
396	73.61	28.87	10.88	0.24	0.72	1.14	115.46	2.55	6.19
397	89.91	51.71	18.67	0.29	1.25	3.54	165.37	1.74	5.96
398	64.55	20.45	14.31	0.56	1.02	1.41	102.3	3.16	6.17
399	80.54	34.82	15.14	0.19	0.03	2.22	132.94	2.31	5.77
400	83.51	30.14	13.85	0.55	0.88	1.6	130.53	2.77	6.61
401	54.44	25.01	11.11	0.48	0.61	1.17	92.82	2.18	6.38
402	66.01	23.13	13.79	0.43	0.92	1.26	105.54	2.85	6.39
403	79.95	25.66	12.63	0.51	0.78	1.14	120.67	3.12	6.04
404	73.12	38.02	15.85	0.46	0.72	1.62	129.79	1.92	6.25
405	78	45.34	10.85	0.14	0.57	1.54	136.44	1.72	6.09
406	69.41	16.81	9.41	0.37	0.71	0.75	97.46	4.13	6.69
407	77	37.38	12.8	0.26	0.72	1.39	129.55	2.06	6.36
408	70.08	35.44	11.67	0.65	1.19	1.44	120.47	1.98	6.37
409	80.47	25.89	16.94	0.05	1.01	1.15	125.51	3.11	6.44
410	64.75	40.07	14.75	0	0.95	1.81	122.33	1.62	6.57
411	70.14	36.14	14.63	0.45	0.76	1.59	123.71	1.94	6.25
412	89.55	42.91	16.81	0.38	1.28	2.37	153.3	2.09	6.73
413	98.67	37.13	12.74	0.21	0.97	1.5	151.22	2.66	6.98
414	67.67	25.16	14.13	0.71	1.4	1.51	110.58	2.69	6.78
415	80.21	26.03	15.54	0.53	1.1	1.42	124.83	3.08	6.83
416	68.96	24.99	15.33	0.71	1.22	1.26	112.47	2.76	6.83
417	87.35	43.78	15.57	0.41	1.41	1.73	150.25	2	5.67
418	53.14	24.91	10.71	0.64	1.2	1.37	91.97	2.13	6.78
419	53.83	25.6	10.6	0.35	0.74	1.55	92.67	2.1	6.6
420	78.12	36.42	15.67	0.27	0.94	1.36	132.78	2.15	6.53
421	92.2	46.44	18.87	0.62	1.24	2.03	161.4	1.99	5.96
422	82.1	46.36	17.02	0	1.12	2.27	148.87	1.77	5.73
423	67.91	35.05	13.29	0.13	0.95	1.7	119.03	1.94	6.48
424	77.66	37.29	17.36	0.43	0.8	1.48	135.02	2.08	6.28
425	93.83	55.88	18.67	0.49	1.64	2.87	173.38	1.68	5.67
426	34.65	26.1	6.52	0.3	0.39	1.22	69.18	1.33	6.44
427	86.54	58.41	16.83	0	0.94	1.78	164.5	1.48	5.66
428	62.21	30	13.33	0.19	1.02	1.21	107.96	2.07	6.47
429	91.57	44.82	21.56	0.39	1.8	1.88	162.02	2.04	6.76
430	77.43	29.85	10.56	0.44	0.8	1.2	120.28	2.59	6.07
431	42.74	18.7	11.12	0.34	0.46	0.93	74.29	2.29	6.32
432	63.95	28.61	13.9	0.75	0.97	1.13	109.31	2.23	6.67
433	110.78	48.12	22.55	0.67	1.97	2.34	186.43	2.3	6.2
434	74.67	17.39	8.99	0.31	0.62	0.8	102.78	4.29	6.3
435	78.59	38.9	18.36	0.48	0.89	1.62	138.84	2.02	5.84
436	72.22	20.71	9.14	0.47	0.72	0.93	104.19	3.49	6.3
437	84.32	41.85	16.99	0.4	1.29	2.15	147	2.01	6.22
438	51.49	24.34	11.28	0.44	0.85	1.3	89.7	2.12	5.9
439	98.39	31.77	13.61	0.72	1.99	1.27	147.75	3.1	6.03
440	77.35	41.22	15.71	0.57	1.11	1.73	137.69	1.88	6.2
441	87.07	30.47	20.62	0.79	1.59	1.88	142.42	2.86	6.49
442	63.76	45.82	13.88	0.51	0.96	1.87	126.8	1.39	5.9
443	101.24	28.12	18.23	0.65	1.74	1.95	151.93	3.6	6.26
444	68.71	22.71	15.85	0.46	1.08	1.4	110.21	3.03	6.38
445	82.81	28.76	15.14	1.05	1.69	1.66	131.11	2.88	6.47
446	24.31	8.89	7	0.05	0.19	0.53	40.97	2.74	6.16
447	67.88	36.63	15.98	0.69	1.39	2.06	124.63	1.85	5.67
448	81.01	43.2	17.31	0.62	1.08	1.87	145.09	1.88	5.93
449	82.16	26.8	16.5	0.72	1.43	1.49	129.1	3.07	6.83
450	96.76	43.62	16.65	0.34	1.03	1.86	160.26	2.22	6.38
451	67.5	32.26	11.98	0.14	0.74	1.15	113.77	2.09	6.22
452	62.25	32.37	12.11	0.75	1.08	1.48	110.04	1.92	5.88
453	62.93	26.67	12.75	0.14	0.82	0.98	104.29	2.36	6.71
454	89.44	41.06	15.08	0.57	1.02	1.64	148.81	2.18	6.13
455	63.33	34.31	10.46	0.54	0.74	1.14	110.52	1.85	6.91
456	68.87	40.26	12.92	0.21	0.84	2.11	125.21	1.71	5.8
457	78.26	26.81	10.58	0.15	0.52	1.25	117.57	2.92	6.06
458	60.62	31.03	13.47	0.35	0.87	1.49	107.83	1.95	6.77
459	67.32	32.18	14.96	0.54	1.2	2.42	118.62	2.09	5.61
460	77.83	45.69	14.78	0.49	1.05	1.94	141.78	1.7	5.79
461	103.07	38.8	15.52	0	1.16	1.51	160.06	2.66	6.45
462	40.52	16.77	10.03	0.39	0.65	0.81	69.17	2.42	6.45
463	51.64	19.49	8.41	0.15	0.38	1.75	81.82	2.65	6.03
464	50.55	24.45	12.59	0.65	0.94	1.49	90.67	2.07	6.33
465	70.32	25.84	14.53	0.56	1.15	1.41	113.81	2.72	6.09
466	74.16	33.34	13.82	0.27	0.78	1.24	123.61	2.22	6.59
467	67.11	16.36	9.07	0.19	0.61	0.96	94.3	4.1	6.36
468	66.44	29.1	11.09	0.38	0.92	1.54	109.47	2.28	5.86
469	78.93	34.48	15.55	0.63	1.13	1.61	132.33	2.29	6.61
470	58.66	28.55	11.85	0.3	0.48	1.25	101.09	2.05	6.04
471	86.01	27.08	12.46	0.34	1.99	1.81	129.69	3.18	6.56
472	86.77	40.87	13.02	0.4	0.91	1.61	143.58	2.12	6.49
473	85.57	43.53	16.02	0.49	1.11	1.87	148.59	1.97	5.98
474	76.22	26.5	14.96	0.77	1.76	1.62	121.83	2.88	6.44
475	75.17	43.48	15.99	0.6	0.79	1.83	137.86	1.73	5.77
476	66.95	24.82	11.52	0.29	0.91	1.2	105.69	2.7	6.66
477	65.37	25.21	12.91	0.66	1.28	1.11	106.54	2.59	7.03
478	66.72	28.38	11.01	0.56	1.21	1.12	109	2.35	6.65
479	92.74	45.76	15.32	0.38	1.23	2.39	157.82	2.03	5.97
480	78.92	34.55	17.9	0.81	1.13	1.57	134.88	2.28	6.32
481	79	38.63	12.32	0.69	0.85	1.29	132.78	2.04	6.07
482	71.17	35.22	14.27	0.75	0.95	1.47	123.83	2.02	5.84
483	80.25	45.77	19.37	0.29	0.77	1.86	148.31	1.75	5.7
484	80	42.6	13.42	0.21	0.93	2.02	139.18	1.88	6.52
485	82.45	45.08	16.88	0.32	0.86	1.97	147.56	1.83	5.94
486	64.95	23.02	11.4	0.33	0.72	1.31	101.73	2.82	6.79
487	62.92	39.34	22.82	0	0.85	4.37	130.3	1.6	6.91
488	68.94	28.93	9.92	0.21	1.21	1.58	110.79	2.38	6.44
489	79.03	46.13	16.69	0.12	0.81	1.64	144.42	1.71	5.63
490	68.27	29.87	10.87	0.23	0.75	1.46	111.45	2.29	6.53
491	73.12	27.61	14.01	0.65	1.06	1.95	118.4	2.65	6.36
492	91.21	43.04	16.57	0.25	0.78	1.6	153.45	2.12	6.18
493	53.42	26.03	8.79	0.22	0.42	1.17	90.05	2.05	5.97
494	72.83	32.52	10.16	0.21	0.74	1.28	117.74	2.24	6.29
495	79.2	31.68	16.63	0.16	0.77	1.35	129.79	2.5	6.67
496	83.33	44.63	14.46	0.16	0.64	1.79	145.01	1.87	6.64
497	68.69	26.12	15.74	0.32	0.8	1.22	112.89	2.63	6.23
498	70.57	33.79	10.99	0.31	0.6	1.33	117.59	2.09	6.52
499	92.28	42.36	13.73	0.42	1.12	2.08	151.99	2.18	5.64
500	76.48	39.94	14.77	0.53	1.05	1.63	134.4	1.91	6.25
501	61.63	22.39	10.5	0.09	0.47	0.87	95.95	2.75	6.29
502	83.68	50.66	15.75	0.34	0.96	1.91	153.3	1.65	5.92
503	66.31	38	11.77	0.14	0.52	3.26	120	1.75	5.88
504	110.54	62.97	19.06	0.25	1.36	2.24	196.42	1.76	6.05
505	44.01	26.92	9.75	0.24	0.94	1.37	83.23	1.64	6.25
506	71.07	36.59	15.62	0.52	1.04	1.9	126.74	1.94	6.03
507	67.74	19.33	9.45	1.69	0.32	0.94	99.47	3.5	6.28
508	87.29	50.9	0.7	10.21	2.71	0.25	152.06	1.71	5.43
509	89.03	47.03	14.47	0.79	0.59	1.67	153.58	1.89	5.53
510	87.96	23.8	16.41	1.06	1.39	0.94	131.56	3.7	6.52
511	88.16	30.85	11.94	1.01	1.88	1.47	135.31	2.86	6.5
512	66.1	25.91	11.52	0.44	1.1	1.15	106.22	2.55	6.5
513	47.94	13.23	8.04	0.66	0.75	0.8	71.42	3.62	7.19
514	49.89	24.34	6.84	0.51	0.91	0.83	83.32	2.05	7.12
515	69.85	20.24	10.69	0.61	0.94	1.03	103.36	3.45	6.71
516	53.59	13.42	8.59	0.93	1.05	0.75	78.33	3.99	7.07
517	48.13	14.76	8.75	0.69	1.03	0.97	74.33	3.26	7.09
518	67.04	15.73	10.01	1.13	1.47	1.05	96.43	4.26	7.1
519	71.48	23.4	10.57	0.65	0.95	1.07	108.12	3.05	6.67
520	72.79	30.33	15.32	0.86	1.31	1.69	122.3	2.4	6.79
521	55.5	14.35	10.5	1.03	1.21	0.77	83.36	3.87	6.99
522	52.51	21.37	7.71	0.84	1.39	1.1	84.92	2.46	6.96
523	38.01	15.16	7.68	0.48	0.74	0.91	62.98	2.51	6.9
524	45.99	12.19	9.79	0.92	1.04	0.63	70.56	3.77	7.05
525	62	18.98	11.05	1.15	1.55	1.04	95.77	3.27	6.97
526	57.28	18.78	9.28	1.03	1.22	0.75	88.34	3.05	6.89
527	59.7	23.32	9.98	0.6	0.97	0.95	95.52	2.56	6.59
528	41.74	8.53	9.01	0.99	1.38	0.76	62.41	4.9	6.95
529	84.53	27.57	15.69	0.55	0.98	1.25	130.57	3.07	6.41
530	91.86	30.82	15.7	0.53	1.29	1.47	141.67	2.98	6.24
531	65.17	20.19	10.7	0.54	1	1.06	98.66	3.23	6.74
532	60.26	20.32	13.06	0.64	0.74	1.1	96.12	2.97	6.42
533	55.45	17.79	8.45	0.67	1.28	0.97	84.61	3.12	6.7
534	48.57	19.49	11.01	1.05	1.47	1.05	82.64	2.49	6.69
535	63.06	31.16	11.03	0.81	1.43	1.68	109.17	2.02	6.62
536	48.89	19.64	7.31	0.95	1.18	0.79	78.76	2.49	6.86
537	71.59	25.04	11.19	1.01	1.75	1.42	112	2.86	6.49
538	69.26	16.95	11.41	0.66	1.06	0.96	100.3	4.09	6.86
539	65.93	16.83	10.66	0.78	1.4	0.98	96.58	3.92	6.69
540	78.77	17.76	12.47	1.28	1.73	1.3	113.31	4.44	6.7
541	37.43	11.71	5.74	0.87	1.31	1.25	58.31	3.2	7.04
542	66.23	20.35	9.76	0.69	1.16	0.99	99.18	3.25	6.73
543	65.73	17.92	10.99	0.71	1.2	0.81	97.36	3.67	6.58
544	65.8	22.28	11.93	0.54	1.19	1.17	102.91	2.95	6.71
545	41.25	17.05	8.4	0.55	1.1	0.87	69.22	2.42	6.9
546	51.13	16.54	8.88	1.14	1.54	0.9	80.13	3.09	7.05
547	60.29	11.12	11.43	0.95	1.24	0.76	85.79	5.42	6.91
548	64.94	16.23	10.15	1.33	1.69	0.9	95.24	4	6.96
549	67.04	18.36	9.41	1.26	1.59	0.85	98.51	3.65	6.91
550	54.11	9.8	10.72	0.92	1.12	0.71	77.38	5.52	6.87
551	60.36	16.62	10.44	1.01	1.45	0.89	90.77	3.63	6.65
552	68.64	17.9	10.5	1.32	1.56	0.94	100.86	3.83	6.85
553	76.75	19.4	10.41	0.87	1.5	1.05	109.98	3.96	6.48
554	30.55	6.2	0.9	4.12	0.51	0.51	42.79	4.93	7.17
555	39.84	11.59	4.74	0.93	1.15	0.6	58.85	3.44	7.26
556	72.49	25.39	9.81	1.31	1.64	1.14	111.78	2.86	6.75
557	38.93	8.65	4.76	0.54	0.68	0.6	54.16	4.5	7.21
558	45.65	11.83	8.59	0.93	1.15	0.8	68.95	3.86	7.01
559	105.27	36.93	19.77	0.97	1.42	2.03	166.39	2.85	6.88
560	69.79	15.49	12.74	1.21	1.48	0.95	101.66	4.51	6.83
561	71.89	17.43	10.97	1.04	1.46	1.04	103.83	4.13	6.76
562	47.54	6.06	7.48	0.7	0.86	0.45	63.09	7.84	7.5
563	71.53	23.03	10.3	1.31	1.77	1	108.94	3.11	6.69
564	58.81	18.89	10.8	0.84	1.1	0.87	91.31	3.11	6.83
565	52.49	8.24	8.69	1.06	1.19	0.6	72.27	6.37	7.22
566	75.97	21.35	14.06	1.32	1.72	1	115.42	3.56	6.61
567	54.76	13.83	9.02	1.11	1.25	0.63	80.6	3.96	7.17
568	69.94	20.54	8.47	0.52	0.86	0.68	101.01	3.41	7.2
569	63.66	20.55	9.27	0.51	0.9	0.98	95.87	3.1	6.91
570	78.43	22.51	13.38	1.09	1.69	1.4	118.5	3.48	6.59
571	67.5	11.7	11.34	1.06	1.27	0.78	93.65	5.77	7.03
572	75.5	25.29	11.22	0.54	1.01	1.16	114.72	2.99	6.65
573	65.88	15.91	9.13	1.17	1.56	0.8	94.45	4.14	6.76
574	70.72	15.19	8.08	0.91	1.38	0.8	97.08	4.66	6.93
575	65.67	18.89	7.86	1.11	1.48	0.83	95.84	3.48	6.96
576	54.29	11.57	10.96	0.46	0.84	0.7	78.82	4.69	6.81
577	38.44	6.08	7.21	0.71	0.82	0.45	53.71	6.33	7.13
578	48.06	16.12	7.8	0.66	0.85	0.71	74.2	2.98	6.68
579	39.81	9.16	7.49	0.82	0.89	0.46	58.63	4.34	7.08
580	55.04	17.31	10.03	0.79	1.43	1.07	85.67	3.18	6.63
581	78.8	19.93	12.34	1.53	2	1.14	115.74	3.95	6.7
582	55.77	19.09	10.89	0.85	1.31	0.9	88.81	2.92	6.68
583	51.1	11.21	6.16	1.22	1.49	0.76	71.94	4.56	7
584	68.5	23.88	11.31	0.83	1.45	1.22	107.19	2.87	6.73
585	48.47	14.73	8.05	1.04	1.33	0.66	74.28	3.29	7.09
586	54.64	27.89	7.87	0.67	1.34	1.18	93.59	1.96	6.93
587	69.55	23.73	10.38	1.42	1.72	1.02	107.82	2.93	6.11
588	30.29	2.63	4.67	0.63	0.8	0.36	39.38	11.53	6.45
589	49.18	11.17	8.33	1.1	1.36	0.84	71.98	4.4	6.93
590	63.03	18.15	12.24	0.86	1.29	1.1	96.67	3.47	7.08
591	44.79	8.28	8.94	0.92	1.09	0.61	64.63	5.41	7.18
592	46.87	13.35	6.2	0.84	0.83	0.52	68.61	3.51	7.09
593	44.22	9.77	7.01	0.77	1	0.62	63.39	4.52	7.3
594	71.32	23	11.41	0.76	1.28	1	108.77	3.1	6.7
595	52.39	16.7	9.12	0.48	0.8	0.74	80.23	3.14	6.97
596	73.51	19.04	11.65	1.48	2.01	1.23	108.92	3.86	6.69
597	56.89	10.2	8.08	1.03	1.32	0.78	78.3	5.58	7.02
598	52.75	9.38	6.4	1.02	1.28	0.68	71.51	5.62	7.06
599	48.16	22.31	9.83	0.43	1.5	1.58	83.81	2.16	7.04
600	89.03	25.12	14.13	1.57	2.06	1.31	133.22	3.54	6.68
601	50.69	11.38	7.07	0.82	1.35	0.76	72.07	4.45	7.05
602	41.91	10.7	4.86	0.77	1.06	0.54	59.84	3.92	7.49
603	58.51	10.96	8.33	1.23	1.61	0.78	81.42	5.34	7.07
