# Supplementary material for: Host genetic variation in SPINK5 regulates rumen epithelial barrier function and shapes heritable microbial communities through SCFA-mediated mechanisms in dairy cattle
Source: Research Square preprint supplement (doi:10.21203/rs.3.rs-8264600/v1), 2026-01-19
Supplement: Supplementary file 3 [file 36e8073a1ac92aab8ea42e90.docx]

Supplementary Table S3. Primer sequences of the target genes.

| Gene | Accession No. | Sequences | Efficiency, % |
| --- | --- | --- | --- |
| *DSG3* | NM_001192685.1 | F: CGCCATCGGTCTGCTATTCC | 97 |
|  |  | R: CGGTCACTCCCCCAATAGGA |
| *CNFN* | NM_001075542.1 | F: GCCCTGACCTCCCTCAGTAT | 98 |
|  |  | R: TCAAACTGCATCTTGCTGGC |
| *TGM1* | NM_001010991.1 | F: ATGGATGGCAGGTTGTGGAC | 96 |
|  |  | R: AGGGTGTGTCGTACTTCATGT |
| *POLR2G* | NM_001015633.1 | F: TCATCTCTCGACATTCCATCCC | 98 |
|  |  | R: ATCATCCATCAGGGAGCCGA |  |
