# Supplementary material for: Host genetic variation in SPINK5 regulates rumen epithelial barrier function and shapes heritable microbial communities through SCFA-mediated mechanisms in dairy cattle
Source: Research Square preprint supplement (doi:10.21203/rs.3.rs-8264600/v1), 2026-01-19
Supplement: Supplementary file 4 [file 751982ee6ef927a3ad9fc325.xlsx]

## Sheet: Table S1
Supplementary Table S1. Metadata for the 603 Holstein dairy cows included in the microbiome–genotype association analysis, listing for each animal the sample ID, microbiome sequencing data ID, genotype sequencing data ID, farm of origin, parity, and days in milk (DIM).
Sample ID	Microbiome data ID	Genotype data ID	Farm	​​Parity	DIM
1	A1	NJND1-232295	A	2	69
2	A10	NJND10-219289	A	2	63
3	A100	NJND100-219049	A	2	181
4	A101	NJND101-219055	A	2	185
5	A102	NJND102-219150	A	2	190
6	A103	NJND103-219164	A	2	165
7	A104	NJND104-219196	A	2	192
8	A105	NJND105-219219	A	2	164
9	A106	NJND106-219241	A	2	146
10	A107	NJND107-219259	A	2	181
11	A108	NJND108-219269	A	2	185
12	A109	NJND109-232051	A	2	154
13	A11	NJND11-219207	A	2	70
14	A110	NJND110-232131	A	2	180
15	A111	NJND111-232139	A	2	182
16	A112	NJND112-232222	A	2	184
17	A114	NJND114-232273	A	2	149
18	A115	NJND115-232284	A	2	172
19	A117	NJND117-232309	A	2	183
20	A118	NJND118-235114	A	2	180
21	A12	NJND12-181958	A	2	74
22	A120	NJND120-235432	A	2	154
23	A121	NJND121-235550	A	2	191
24	A122	NJND122-235556	A	2	166
25	A13	NJND13-219307	A	2	76
26	A14	NJND14-219134	A	2	56
27	A17	NJND17-181915	A	2	92
28	A18	NJND18-213924	A	2	88
29	A19	NJND19-213882	A	2	92
30	A2	NJND2-232350	A	2	70
31	A20	NJND20-219282	A	2	91
32	A21	NJND21-181929	A	2	92
33	A22	NJND22-213946	A	2	87
34	A23	NJND23-235005	A	2	89
35	A24	NJND24-219291	A	2	97
36	A25	NJND25-181937	A	2	90
37	A26	NJND26-232049	A	2	90
38	A27	NJND27-219067	A	2	92
39	A3	NJND3-235437	A	2	71
40	A32	NJND32-219004	A	2	104
41	A33	NJND33-213996	A	2	101
42	A35	NJND35-219199	A	2	103
43	A36	NJND36-212327	A	2	98
44	A37	NJND37-213871	A	2	98
45	A38	NJND38-232150	A	2	103
46	A39	NJND39-181965	A	2	102
47	A4	NJND4-212330	A	2	67
48	A40	NJND40-232323	A	2	105
49	A41	NJND41-181145	A	2	104
50	A42	NJND42-232155	A	2	107
51	A43	NJND43-213795	A	2	107
52	A44	NJND44-235215	A	2	104
53	A45	NJND45-212302	A	2	104
54	A47	NJND47-213951	A	2	119
55	A49	NJND49-219069	A	2	125
56	A5	NJND5-232339	A	2	54
57	A50	NJND50-181976	A	2	117
58	A51	NJND51-232059	A	2	118
59	A52	NJND52-219281	A	2	113
60	A53	NJND53-219298	A	2	109
61	A54	NJND54-232148	A	2	127
62	A55	NJND55-2436	A	2	124
63	A57	NJND57-219253	A	2	128
64	A60	NJND60-219189	A	2	120
65	A62	NJND62-209030	A	2	133
66	A63	NJND63-181945	A	2	141
67	A64	NJND64-212318	A	2	135
68	A65	NJND65-235574	A	2	135
69	A66	NJND66-181936	A	2	141
70	A68	NJND68-213809	A	2	130
71	A69	NJND69-219159	A	2	141
72	A70	NJND70-219272	A	2	133
73	A71	NJND71-219174	A	2	134
74	A73	NJND73-181870	A	2	139
75	A74	NJND74-181971	A	2	142
76	A75	NJND75-1510	A	2	166
77	A78	NJND78-181878	A	2	183
78	A79	NJND79-181906	A	2	158
79	A80	NJND80-181907	A	2	150
80	A81	NJND81-181918	A	2	168
81	A82	NJND82-181919	A	2	161
82	A83	NJND83-181924	A	2	182
83	A84	NJND84-181931	A	2	188
84	A86	NJND86-181948	A	2	170
85	A87	NJND87-181973	A	2	182
86	A88	NJND88-208134	A	2	165
87	A89	NJND89-212325	A	2	180
88	A9	NJND9-213651	A	2	83
89	A90	NJND90-213427	A	2	156
90	A91	NJND91-213649	A	2	184
91	A92	NJND92-213663	A	2	144
92	A93	NJND93-213835	A	2	183
93	A94	NJND94-213959	A	2	190
94	A96	NJND96-213967	A	2	195
95	A97	NJND97-213973	A	2	183
96	A98	NJND98-213974	A	2	173
97	A99	NJND99-214006	A	2	175
98	B1	B19028	B	2	293
99	B10	B16160	B	3	295
100	B11	B170118	B	3	258
101	B12	B17063	B	3	215
102	B13	B17095	B	3	199
103	B14	B17260	B	3	257
104	B15	B18108	B	2	298
105	B16	B18117	B	2	185
106	B19	B15040	B	4	99
107	B2	B17253	B	3	296
108	B20	B16154	B	4	105
109	B21	B17066	B	4	51
110	B22	B17206	B	4	83
111	B23	B17239	B	4	48
112	B24	B17245	B	3	177
113	B25	B17256	B	4	70
114	B26	B17273	B	3	128
115	B27	B17274	B	4	124
116	B28	B17293	B	3	76
117	B29	B17294	B	3	168
118	B31	B18126	B	2	139
119	B32	B19030	B	2	146
120	B33	B19054	B	2	163
121	B34	B17225	B	3	276
122	B35	B170183	B	3	152
123	B36	B17233	B	3	207
124	B37	B19040	B	2	124
125	B38	B16164	B	4	207
126	B39	B19041	B	2	170
127	B4	B16184	B	4	281
128	B40	B19059	B	2	209
129	B41	B19024	B	2	108
130	B42	B17281	B	4	151
131	B43	B18104	B	2	285
132	B44	B17329	B	3	196
133	B46	B17280	B	3	152
134	B47	B17055	B	3	244
135	B48	B18016	B	3	171
136	B49	B170196	B	2	252
137	B50	B18122	B	2	240
138	B52	B17277	B	3	238
139	B54	B18119	B	2	303
140	B55	B17202	B	3	173
141	B56	B16153	B	4	120
142	B57	B19055	B	2	197
143	B58	B170177	B	4	111
144	B6	B17070	B	3	285
145	B60	B170180	B	4	47
146	B61	B170136	B	4	33
147	B62	B18138	B	2	156
148	B64	B17081	B	3	201
149	B7	B17312	B	3	286
150	B70	B19061	B	1	316
151	B71	B17224	B	3	293
152	B72	B17088	B	3	303
153	B73	B17236	B	3	206
154	B74	B19010	B	3	119
155	B75	B18111	B	2	251
156	B76	B19096	B	1	277
157	B8	B16022	B	4	271
158	B9	B16143	B	4	289
159	C1	C16023	C	4	73
160	C100	C381451	C	3	118
161	C101	C381560	C	3	83
162	C102	C381595	C	3	189
163	C103	C16071	C	4	83
164	C104	C17199	C	3	289
165	C105	C17202	C	3	282
166	C106	C18052	C	2	173
167	C107	C18081	C	3	219
168	C108	C18096	C	3	176
169	C109	C18154	C	2	177
170	C11	C18075	C	3	120
171	C111	C19041	C	2	267
172	C113	C19060	C	2	190
173	C114	C19067	C	2	280
174	C115	C19068	C	2	215
175	C116	C19144	C	2	166
176	C117	C380839	C	3	283
177	C12	C18089	C	3	162
178	C13	C18115	C	3	159
179	C14	C18130	C	3	61
180	C15	C18159	C	2	260
181	C16	C18166	C	2	177
182	C17	C18167	C	3	58
183	C18	C18169	C	2	268
184	C19	C18172	C	2	169
185	C2	C16144	C	4	83
186	C20	C18188	C	2	245
187	C21	C18190	C	2	274
188	C22	C19012	C	2	182
189	C23	C19034	C	2	179
190	C24	C19038	C	2	175
191	C25	C19045	C	2	155
192	C26	C19046	C	2	156
193	C27	C19055	C	2	54
194	C28	C19059	C	2	261
195	C29	C19064	C	2	229
196	C3	C17063	C	3	111
197	C30	C19071	C	2	169
198	C31	C19077	C	2	285
199	C33	C19080	C	2	266
200	C34	C19084	C	2	270
201	C35	C19089	C	2	73
202	C36	C19100	C	2	266
203	C37	C19102	C	2	234
204	C39	C19107	C	2	100
205	C4	C17159	C	3	286
206	C40	C19113	C	2	256
207	C41	C19115	C	2	156
208	C42	C19120	C	2	258
209	C43	C19121	C	2	257
210	C44	C19122	C	2	98
211	C45	C19123	C	2	233
212	C47	C19133	C	2	107
213	C48	C19137	C	2	165
214	C49	C19150	C	2	58
215	C5	C17192	C	3	174
216	C50	C19155	C	2	63
217	C51	C19161	C	2	94
218	C52	C19162	C	2	76
219	C54	C370870	C	4	99
220	C55	C380456	C	3	286
221	C56	C380912	C	3	60
222	C57	C381227	C	3	106
223	C59	C16070	C	4	210
224	C6	C17227	C	3	151
225	C60	C16105	C	4	273
226	C61	C17029	C	4	291
227	C63	C17162	C	4	123
228	C64	C17208	C	2	169
229	C65	C17216	C	3	202
230	C66	C18014	C	2	148
231	C67	C18050	C	3	247
232	C68	C18121	C	2	233
233	C69	C18128	C	2	246
234	C7	C18003	C	3	58
235	C70	C18144	C	2	280
236	C72	C18151	C	2	219
237	C73	C18153	C	2	144
238	C74	C18161	C	2	298
239	C75	C18175	C	2	291
240	C76	C19020	C	2	275
241	C78	C19048	C	2	146
242	C79	C19049	C	2	201
243	C80	C19058	C	2	204
244	C81	C19073	C	2	220
245	C82	C19086	C	2	197
246	C83	C19091	C	2	207
247	C84	C19104	C	2	240
248	C86	C19126	C	2	211
249	C87	C19127	C	2	192
250	C88	C19129	C	2	187
251	C89	C19130	C	2	205
252	C9	C18069	C	3	69
253	C90	C19136	C	2	75
254	C91	C19154	C	2	137
255	C92	C370252	C	4	169
256	C93	C370753	C	4	284
257	C94	C372023	C	3	234
258	C95	C372588	C	4	121
259	C96	C380559	C	3	71
260	C97	C380855	C	3	141
261	C99	C381406	C	3	178
262	D1	D148-197268	D	2	165
263	D10	D88-197706	D	2	158
264	D101	D194-173271	D	4	66
265	D105	D165-201479	D	2	66
266	D106	D156-106113	D	6	62
267	D107	D223-176731	D	4	64
268	D108	D50-162996	D	5	55
269	D11	D74-199260	D	2	166
270	D110	D198-188495	D	3	58
271	D111	D3-190794	D	3	168
272	D112	D133-199321	D	2	164
273	D113	D138-184736	D	3	161
274	D114	D53-192252	D	3	55
275	D115	D89-198075	D	2	163
276	D116	D55-185965	D	3	165
277	D117	D56-199508	D	2	168
278	D118	D16-187448	D	3	166
279	D119	D70-190864	D	3	75
280	D12	D117-200406	D	2	159
281	D120	D61-185578	D	3	158
282	D121	D2-200647	D	2	55
283	D122	D63-181361	D	4	168
284	D123	D181-187614	D	3	167
285	D124	D13-200086	D	2	62
286	D126	D62-177531	D	4	166
287	D127	D127-199202	D	2	146
288	D128	D1-198915	D	2	58
289	D129	D9-192985	D	3	55
290	D13	D115-177348	D	4	160
291	D130	D64-190233	D	3	165
292	D131	D255-193258	D	2	67
293	D132	D5-189373	D	3	168
294	D134	D4-177686	D	4	162
295	D135	D8-189181	D	3	167
296	D136	D171-172912	D	5	60
297	D137	D10-196661	D	2	167
298	D138	D12-187021	D	3	145
299	D139	D60-181067	D	4	166
300	D14	D78-188752	D	3	60
301	D140	D242-192610	D	3	59
302	D141	D11-195769	D	2	161
303	D142	D7-187685	D	3	166
304	D143	D59-186380	D	3	158
305	D144	D184-202377	D	2	74
306	D145	D134-164983	D	5	59
307	D146	D17-202252	D	2	62
308	D147	D190-202316	D	2	69
309	D148	D137-173185	D	4	72
310	D15	D94-173721	D	4	166
311	D151	D144-163005	D	5	62
312	D152	D15-172325	D	4	162
313	D153	D136-176112	D	4	76
314	D154	D185-182277	D	4	58
315	D155	D57-200983	D	2	144
316	D156	D177-201536	D	2	73
317	D157	D143-201722	D	2	69
318	D158	D197-191538	D	3	169
319	D159	D188-202318	D	2	75
320	D16	D105-197726	D	2	161
321	D160	D199-188265	D	3	70
322	D161	D140-200618	D	2	163
323	D162	D6-198501	D	2	162
324	D163	D132-202636	D	2	64
325	D167	D182-16640	D	5	54
326	D168	D187-137371	D	7	63
327	D169	D205-179141	D	4	61
328	D17	D122-189071	D	3	159
329	D171	D189-173337	D	4	75
330	D172	D159-173344	D	4	56
331	D173	D39-191845	D	3	70
332	D174	D195-191670	D	3	60
333	D175	D139-199205	D	2	171
334	D176	D142-201244	D	2	144
335	D177	D58-160917	D	6	60
336	D178	D200-178828	D	4	65
337	D179	D141-119933	D	6	58
338	D18	D121-199206	D	2	55
339	D180	D191-173240	D	5	73
340	D181	D54-192731	D	2	163
341	D182	D101-200973	D	2	145
342	D183	D123-188194	D	3	166
343	D184	D119-173733	D	4	168
344	D185	D113-186240	D	3	161
345	D186	D95-200404	D	2	71
346	D187	D99-178205	D	4	145
347	D188	D104-199521	D	2	165
348	D189	D186-201008	D	2	58
349	D19	D110-196452	D	2	160
350	D191	D179-191101	D	3	164
351	D192	D124-177605	D	4	166
352	D193	D125-199531	D	2	161
353	D194	D79-185603	D	3	162
354	D195	D103-173994	D	4	158
355	D196	D131-200649	D	2	166
356	D197	D98-197908	D	2	72
357	D198	D109-190785	D	3	68
358	D199	D111-189085	D	3	160
359	D2	D76-197379	D	2	160
360	D20	D71-177399	D	4	169
361	D200	D77-178270	D	4	166
362	D201	D126-166684	D	5	159
363	D202	D91-199015	D	2	165
364	D203	D100-196257	D	2	159
365	D204	D135-164830	D	5	270
366	D205	D129-198462	D	2	165
367	D206	D41-191829	D	3	70
368	D207	D254-190192	D	3	164
369	D209	D33-200708	D	2	158
370	D21	D73-199142	D	2	161
371	D210	D27-190708	D	3	61
372	D211	D35-202604	D	2	58
373	D213	D29-201446	D	2	55
374	D214	D46-180017	D	4	65
375	D215	D28-191895	D	3	54
376	D216	D236-180178	D	4	65
377	D218	D20-181491	D	4	63
378	D219	D25-106458	D	6	56
379	D22	D97-176214	D	4	165
380	D220	D40-118756	D	5	60
381	D221	D37-169435	D	5	63
382	D222	D18-165812	D	5	63
383	D223	D26-176234	D	4	58
384	D224	D31-202376	D	2	61
385	D225	D68-192116	D	3	60
386	D226	D240-193124	D	2	159
387	D227	D253-190468	D	2	158
388	D228	D232-178067	D	4	166
389	D229	D251-175458	D	4	166
390	D23	D118-174136	D	4	159
391	D231	D244-198182	D	2	165
392	D232	D252-189065	D	3	166
393	D233	D239-185238	D	3	150
394	D234	D22-198181	D	2	164
395	D236	D246-200482	D	2	161
396	D237	D30-198326	D	2	66
397	D239	D241-184506	D	3	165
398	D24	D75-189161	D	3	159
399	D240	D69-186118	D	3	159
400	D241	D247-200273	D	2	167
401	D242	D178-190156	D	3	158
402	D243	D250-184473	D	3	168
403	D244	D34-178013	D	4	144
404	D246	D237-198791	D	2	165
405	D247	D23-188516	D	3	163
406	D248	D248-190453	D	3	158
407	D249	D47-202433	D	2	64
408	D25	D96-198730	D	2	63
409	D250	D66-200248	D	2	159
410	D251	D233-190361	D	3	163
411	D252	D19-188633	D	3	161
412	D254	D45-154582	D	4	58
413	D255	D238-200605	D	2	162
414	D256	D21-154856	D	6	55
415	D257	D234-190168	D	3	163
416	D258	D249-176981	D	4	145
417	D259	D231-190013	D	3	70
418	D26	D114-199148	D	2	161
419	D260	D24-188377	D	3	57
420	D261	D38-183455	D	3	65
421	D262	D235-192368	D	3	61
422	D263	D180-198280	D	2	165
423	D264	D243-188118	D	3	160
424	D265	D36-192594	D	2	77
425	D266	D245-177810	D	4	165
426	D267	D43-182439	D	3	57
427	D268	D67-198340	D	2	168
428	D269	D65-186595	D	3	163
429	D27	D84-200712	D	2	71
430	D273	D42-181215	D	4	56
431	D276	D152-175111	D	3	162
432	D277	D44-194049	D	2	159
433	D278	D149-167296	D	5	68
434	D279	D193-190813	D	3	162
435	D28	D86-187011	D	3	167
436	D280	D175-181815	D	4	68
437	D281	D32-188245	D	2	55
438	D29	D87-199261	D	2	162
439	D3	D92-194660	D	2	161
440	D30	D81-188566	D	3	61
441	D31	D130-199380	D	2	170
442	D33	D146-197094	D	2	160
443	D34	D80-170014	D	4	144
444	D35	D128-199275	D	2	160
445	D36	D102-200311	D	2	162
446	D37	D164-178646	D	4	162
447	D38	D83-194164	D	2	60
448	D39	D72-199552	D	2	167
449	D4	D116-200457	D	2	158
450	D41	D120-194888	D	2	161
451	D43	D155-201798	D	2	57
452	D44	D172-197744	D	2	162
453	D45	D157-107014	D	6	66
454	D46	D210-170714	D	5	75
455	D47	D173-202013	D	2	60
456	D48	D224-201954	D	2	71
457	D49	D222-180018	D	4	74
458	D5	D85-186496	D	3	167
459	D50	D229-172166	D	5	64
460	D51	D170-200081	D	2	166
461	D52	D174-202458	D	2	63
462	D53	D162-188665	D	3	71
463	D54	D208-167242	D	5	56
464	D55	D163-185656	D	3	58
465	D56	D211-118673	D	5	65
466	D57	D192-190728	D	3	59
467	D58	D217-181924	D	4	74
468	D59	D228-192535	D	3	59
469	D6	D107-200097	D	2	158
470	D60	D158-189426	D	3	159
471	D61	D169-188529	D	3	56
472	D63	D168-200098	D	2	159
473	D64	D218-202491	D	2	65
474	D65	D154-174699	D	4	72
475	D66	D202-171154	D	5	67
476	D67	D220-202368	D	2	68
477	D68	D216-193138	D	3	63
478	D69	D212-152712	D	6	62
479	D7	D90-200218	D	2	62
480	D70	D215-178409	D	4	55
481	D71	D225-202940	D	2	65
482	D72	D49-181837	D	4	66
483	D73	D213-108803	D	5	58
484	D74	D214-167025	D	5	69
485	D75	D161-201543	D	2	66
486	D76	D151-182175	D	4	69
487	D77	D183-173021	D	5	55
488	D78	D206-181982	D	4	60
489	D8	D93-197221	D	2	164
490	D80	D147-202574	D	2	59
491	D81	D150-163563	D	6	58
492	D82	D201-191596	D	3	56
493	D83	D160-192393	D	2	161
494	D84	D176-201381	D	2	55
495	D85	D203-192341	D	2	167
496	D86	D196-172212	D	5	59
497	D87	D204-190616	D	3	158
498	D88	D209-188725	D	3	65
499	D89	D153-151644	D	7	63
500	D9	D112-187555	D	3	164
501	D90	D145-176703	D	4	63
502	D91	D230-106480	D	6	74
503	D92	D226-182062	D	4	66
504	D93	D167-180025	D	4	54
505	D95	D166-192496	D	3	60
506	D96	D219-198889	D	2	161
507	D97	D207-191728	D	3	60
508	D98	D52-182854	D	3	59
509	D99	D227-200339	D	2	164
510	E1	NJAU-BH1	E	3	139
511	E10	NJAU-BH10	E	2	156
512	E11	NJAU-BH11	E	4	156
513	E12	NJAU-BH12	E	4	151
514	E13	NJAU-BH13	E	2	159
515	E14	NJAU-BH14	E	4	140
516	E15	NJAU-BH15	E	2	158
517	E16	NJAU-BH16	E	2	127
518	E17	NJAU-BH17	E	3	158
519	E18	NJAU-BH18	E	2	151
520	E19	NJAU-BH19	E	2	169
521	E2	NJAU-BH2	E	2	127
522	E20	NJAU-BH20	E	2	185
523	E21	NJAU-BH21	E	2	170
524	E22	NJAU-BH22	E	2	155
525	E23	NJAU-BH23	E	3	134
526	E24	NJAU-BH24	E	4	175
527	E25	NJAU-BH25	E	2	149
528	E26	NJAU-BH26	E	2	134
529	E27	NJAU-BH27	E	3	179
530	E28	NJAU-BH28	E	2	149
531	E29	NJAU-BH29	E	2	171
532	E3	NJAU-BH3	E	3	145
533	E30	NJAU-BH30	E	3	136
534	E31	NJAU-BH31	E	3	143
535	E32	NJAU-BH32	E	2	184
536	E33	NJAU-BH33	E	3	155
537	E34	NJAU-BH34	E	3	136
538	E35	NJAU-BH35	E	2	178
539	E36	NJAU-BH36	E	3	140
540	E37	NJAU-BH37	E	3	159
541	E38	NJAU-BH38	E	2	135
542	E39	NJAU-BH39	E	2	184
543	E4	NJAU-BH4	E	2	137
544	E40	NJAU-BH40	E	3	183
545	E41	NJAU-BH41	E	2	132
546	E44	NJAU-BH44	E	3	128
547	E45	NJAU-BH45	E	2	136
548	E46	NJAU-BH46	E	3	161
549	E47	NJAU-BH47	E	3	130
550	E49	NJAU-BH49	E	3	149
551	E5	NJAU-BH5	E	4	146
552	E50	NJAU-BH50	E	4	186
553	E51	NJAU-BH51	E	3	138
554	E52	NJAU-BH52	E	3	133
555	E53	NJAU-BH53	E	2	133
556	E54	NJAU-BH54	E	3	175
557	E55	NJAU-BH55	E	4	159
558	E56	NJAU-BH56	E	2	143
559	E57	NJAU-BH57	E	2	185
560	E58	NJAU-BH58	E	2	130
561	E59	NJAU-BH59	E	3	127
562	E6	NJAU-BH6	E	3	169
563	E60	NJAU-BH60	E	3	144
564	E61	NJAU-BH61	E	3	167
565	E62	NJAU-BH62	E	3	144
566	E63	NJAU-BH63	E	3	136
567	E64	NJAU-BH64	E	2	133
568	E65	NJAU-BH65	E	2	158
569	E66	NJAU-BH66	E	4	184
570	E67	NJAU-BH67	E	3	126
571	E69	NJAU-BH69	E	3	186
572	E7	NJAU-BH7	E	2	135
573	E70	NJAU-BH70	E	2	175
574	E71	NJAU-BH71	E	3	128
575	E72	NJAU-BH72	E	3	180
576	E73	NJAU-BH73	E	2	177
577	E74	NJAU-BH74	E	2	171
578	E75	NJAU-BH75	E	3	160
579	E76	NJAU-BH76	E	4	140
580	E77	NJAU-BH77	E	3	155
581	E78	NJAU-BH78	E	3	171
582	E79	NJAU-BH79	E	3	137
583	E8	NJAU-BH8	E	3	158
584	E80	NJAU-BH80	E	2	132
585	E81	NJAU-BH81	E	4	170
586	E82	NJAU-BH82	E	2	168
587	E83	NJAU-BH83	E	2	184
588	E84	NJAU-BH84	E	2	145
589	E85	NJAU-BH85	E	2	140
590	E86	NJAU-BH86	E	2	181
591	E87	NJAU-BH87	E	3	168
592	E88	NJAU-BH88	E	2	185
593	E89	NJAU-BH89	E	2	177
594	E9	NJAU-BH9	E	2	159
595	E90	NJAU-BH90	E	3	141
596	E91	NJAU-BH91	E	3	182
597	E92	NJAU-BH92	E	2	178
598	E93	NJAU-BH93	E	4	174
599	E94	NJAU-BH94	E	2	182
600	E95	NJAU-BH95	E	2	182
601	E96	NJAU-BH96	E	2	135
602	E97	NJAU-BH97	E	3	170
603	E98	NJAU-BH98	E	3	146
