# Supplementary material for: Host genetic variation in SPINK5 regulates rumen epithelial barrier function and shapes heritable microbial communities through SCFA-mediated mechanisms in dairy cattle
Source: Research Square preprint supplement (doi:10.21203/rs.3.rs-8264600/v1), 2026-01-19
Supplement: Supplementary file 5 [file a5e180141dab00dc0c4bf78c.docx]

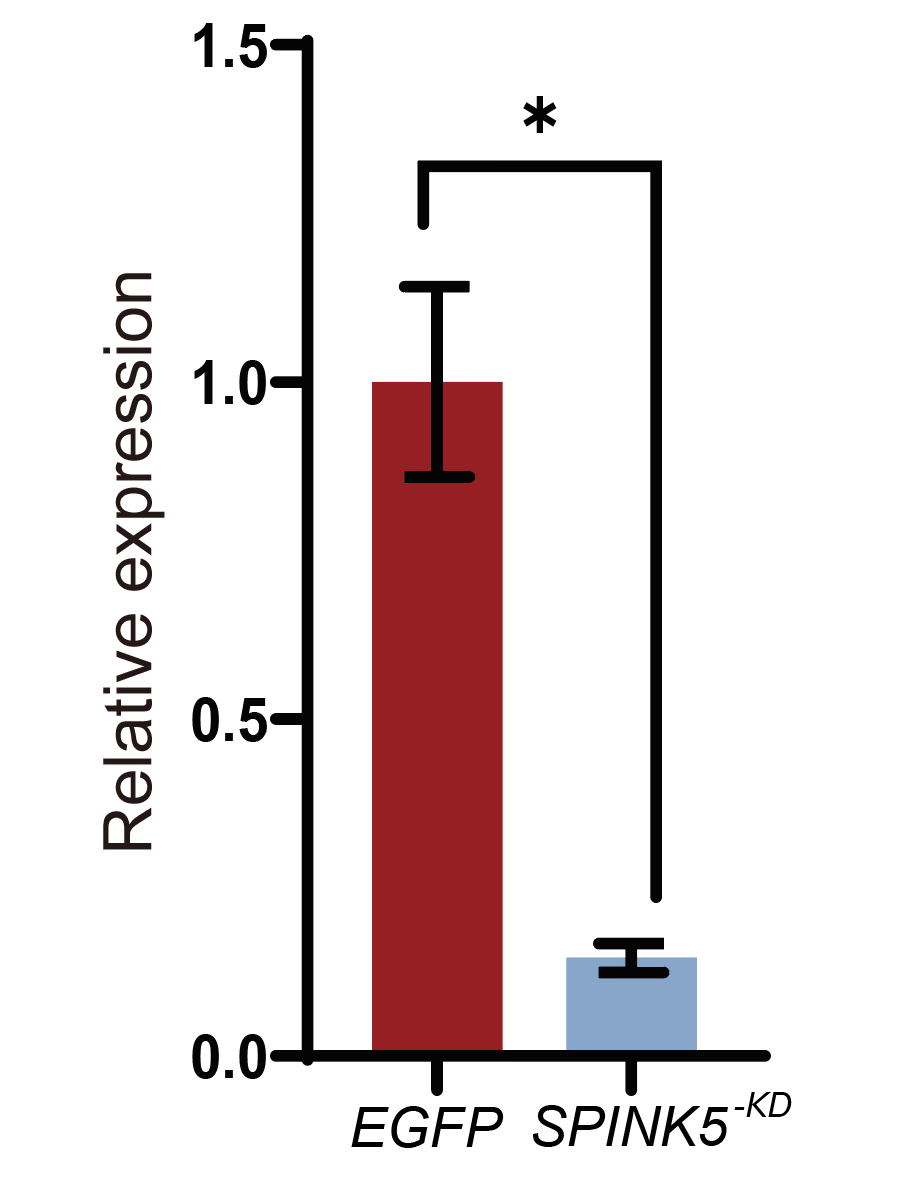


**FIGURE S2.** Expression of *SPINK5* in a rumen epithelial cell line by shRNA-mediated knockdown, compared with the EGFP negative control. Data are presented as mean ± s.e.m. (n = 3 biological replicates).
