# Supplementary material for: Host genetic variation in SPINK5 regulates rumen epithelial barrier function and shapes heritable microbial communities through SCFA-mediated mechanisms in dairy cattle
Source: Research Square preprint supplement (doi:10.21203/rs.3.rs-8264600/v1), 2026-01-19
Supplement: Supplementary file 6 [file ad4ba623cc32ace109f9f88e.docx]

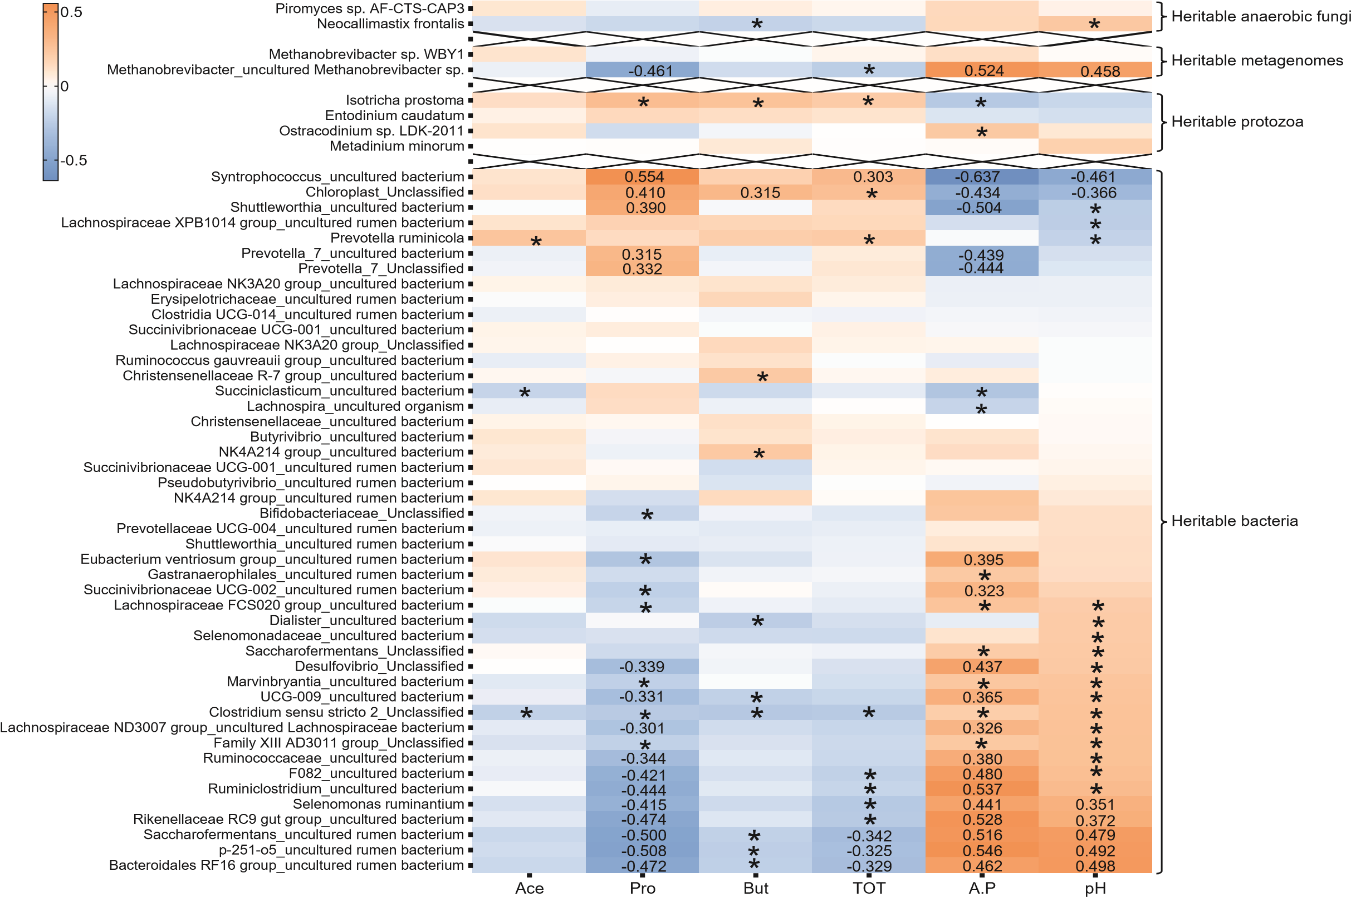


**FIGURE S1.** Heatmap of Spearman correlations between heritable rumen microbes and fermentation parameters. the adjusted *P* < 0.05 and |r| > 0.30, the numeric r value is displayed; the adjusted *P* < 0.05 and 0.20 < |r| ≤ 0.30, an asterisk (*) is displayed. Ace: acetic acid concentration; Pro: propionic acid concentration; But: butyric acid concentration; Tot: total SCFA concentration; A.P: acetate-to-propionate ratio; pH: rumen pH value.
